# Supplementary material for: Epithelial-Mesenchymal-Transition-Like and TGFβ Pathways Associated with Autochthonous Inflammatory Melanoma Development in Mice
Source: PubMed Central journal article supplement (PMC3500287; doi:10.1371/journal.pone.0049419), 2012-11-16
Supplement: pone.0049419.s001.pdf [file pone.0049419.s001.pdf]

A

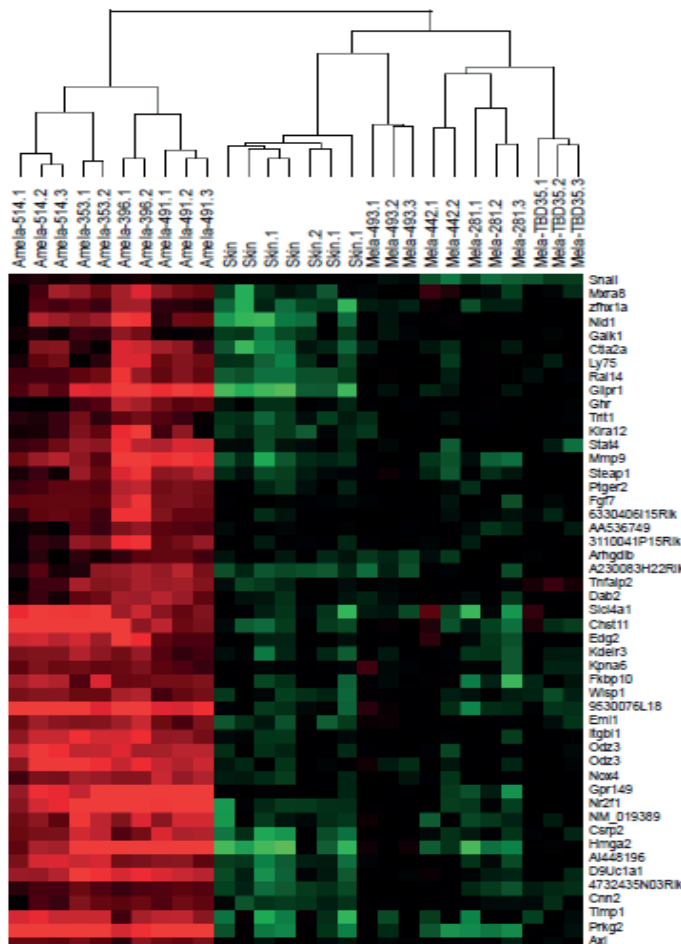

B

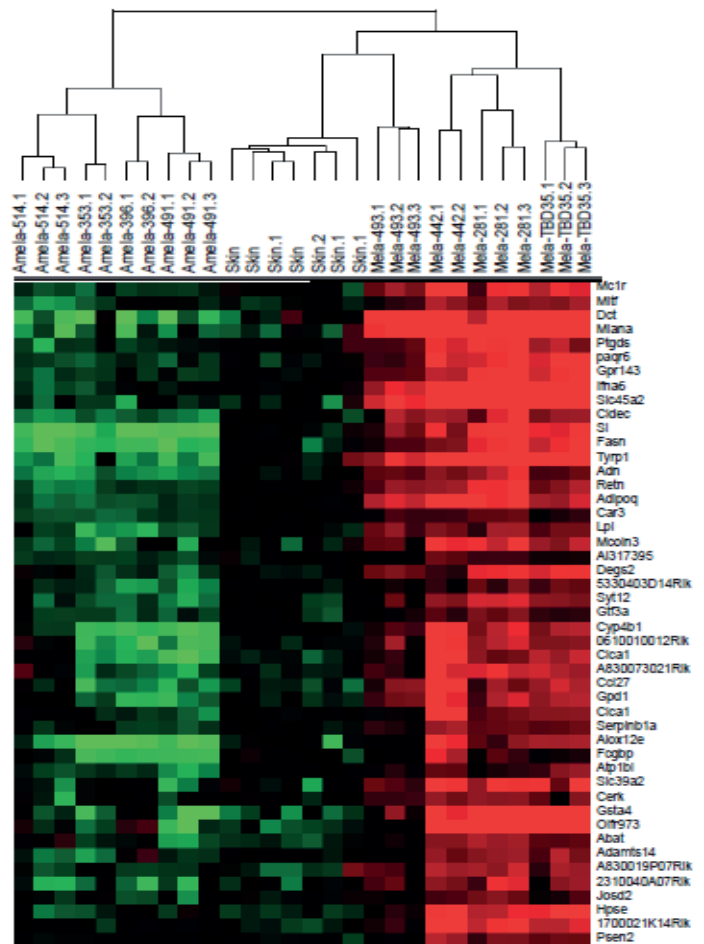

C

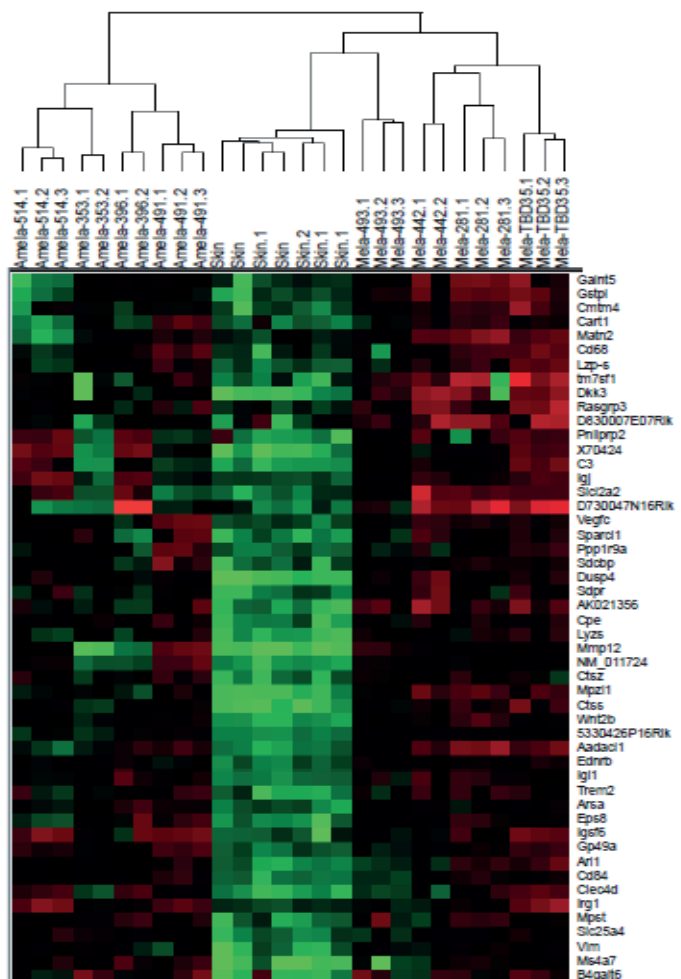

D

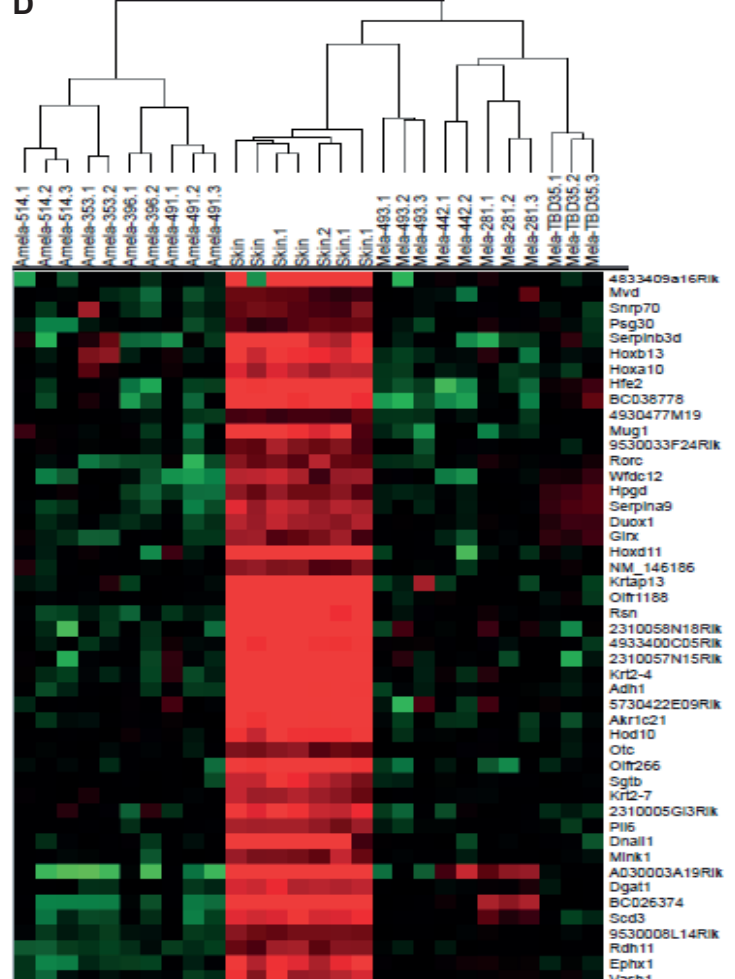

Figure S1
