# Supplementary material for: Epithelial-Mesenchymal-Transition-Like and TGFβ Pathways Associated with Autochthonous Inflammatory Melanoma Development in Mice
Source: PubMed Central journal article supplement (PMC3500287; doi:10.1371/journal.pone.0049419), 2012-11-16
Supplement: pone.0049419.s006.pdf [file pone.0049419.s006.pdf]

**Table S2.** Amela tumor-expressed genes characterizing tumor-infiltrating leukocytes.

| Gene symbol                                         | Gene name                                                                | <sup>(b)</sup> Log2 ratio Amela/Line | <sup>(c)</sup> Log2 ratio Amela/Mela | <sup>(d)</sup> Lineage expression |
|-----------------------------------------------------|--------------------------------------------------------------------------|--------------------------------------|--------------------------------------|-----------------------------------|
| <i><sup>(a)</sup>Immune response and chemotaxis</i> |                                                                          |                                      |                                      |                                   |
| Emr1                                                | EGF-like module containing, mucin-like, hormone receptor-like sequence 1 | 5.94                                 | 0.13                                 | M                                 |
| Ly86                                                | Lymphocyte antigen 86                                                    | 5.72                                 | 1.09                                 | M, L                              |
| Mrc1                                                | Mannose receptor, c type 1                                               | 5.60                                 | 1.12                                 | M                                 |
| Fcgr3                                               | Fc gamma receptor 3                                                      | 4.86                                 | 0.84*                                | M                                 |
| Fbn1                                                | Fibrilin 1                                                               | 4.77                                 | 1.16                                 | S                                 |
| Fcrls/Msr2                                          | Fc receptor-like S, scavenger receptor                                   | 4.60                                 | 1.12                                 | M                                 |
| Ccl12                                               | Chemokine (C-C motif ) ligand 12                                         | 4.19                                 | 1.71                                 | M                                 |
| Mmp3                                                | Matrix metalloproteinase 3                                               | 4.18                                 | 2.05                                 | M, S                              |
| Cd72                                                | CD72 antigen                                                             | 4.10                                 | 1.85                                 | L, M                              |
| C1qa                                                | Complement component 1, q subcomponent, A chain                          | 4.08                                 | 1.39                                 | M                                 |
| Cx3cr1                                              | Chemokine (C-X3-C) receptor 1                                            | 3.90                                 | 1.51                                 | M, L                              |
| Mmp23                                               | Matrix metalloproteinase 23                                              | 3.62                                 | 1.27                                 | M, S                              |
| C1qr1                                               | CD93 antigen                                                             | 3.35                                 | 1.81                                 | M                                 |
| Csf1r                                               | Colony stimulating factor 1 receptor                                     | 2.93                                 | 1.10                                 | M                                 |
| Slamf9                                              | SLAM family member 9                                                     | 2.86                                 | 1.05                                 | M                                 |
| Ltbp2                                               | Latent transforming growth factor beta binding protein 2                 | 2.78                                 | 1.16                                 | S                                 |
| Ccr1                                                | Chemokine (C-C motif ) receptor 1                                        | 2.61                                 | 2.07                                 | M                                 |
| Tgfbr2                                              | Transforming growth factor, beta receptor II                             | 2.24                                 | 0.96*                                | L, M                              |
| Lsp1                                                | Lymphocyte specific 1                                                    | 2.19                                 | 1.28                                 | L, M                              |
| Tlr1                                                | Toll like receptor 1                                                     | 2.18                                 | 1.18                                 | M                                 |
| Cfh                                                 | Complement component factor h                                            | 2.01                                 | 2.15                                 | M                                 |
| Ltbp3                                               | Latent transforming growth factor beta binding protein 3                 | 1.57                                 | 0.96*                                | S                                 |
| Mmp2                                                | Matrix metalloproteinase 2                                               | 1.34                                 | 0.91*                                | S                                 |

(a) Genes characterizing immune response components or chemotaxis that show higher expression in Amela versus Mela primary tumors but are expressed at lower level in Amela lines in culture than in Amela primary tumors.

(b) Ratio of gene expression as Log2 primary Amela/cultured Amela line > 1 with p value < 0.001;

(c) Ratio of gene expression as Log2 primary Amela/primary Mela > 1 with p value < 0.001;

\* Ratio of gene expression as log2 primary Amela/primary Mela between 0 and 1 with p values < 0.05.

(d) Cell lineage with highest expression of the gene taken from the Immunological Genome Project ([www.immgen.org](http://www.immgen.org)) : M for myeloid, L for lymphocytes, S for stromal cells.
