# Supplementary material for: Epithelial-Mesenchymal-Transition-Like and TGFβ Pathways Associated with Autochthonous Inflammatory Melanoma Development in Mice
Source: PubMed Central journal article supplement (PMC3500287; doi:10.1371/journal.pone.0049419), 2012-11-16
Supplement: pone.0049419.s007.pdf [file pone.0049419.s007.pdf]

| Gene      | nb of sites | 1st site   | p values | 2nd site   | p values | 3rd site   | p value | 4th site   | p values |
|-----------|-------------|------------|----------|------------|----------|------------|---------|------------|----------|
| Dkk2      | 4           | AGCCAGACAG | 4.3e-05  | GTCCAGACAT | 8.5e-05  | TGCCAGACTC | 8.5e-05 | AGTCAGACAG | 8.5e-05  |
| Crispld2  | 4           | ACGCAGACAT | 1.9e-05  | GGTCAGACAC | 4.3e-05  | GGCCAGACTG | 4.3e-05 | AGCTAGACAC | 8.5e-05  |
| cnih      | 3           | AGCCAGACAT | 4.3e-05  | AGTCAGACAT | 8.5e-05  | AGCTAGACAC | 8.5e-05 |            |          |
| Arhgdib   | 3           | ACGCAGACAC | 4.5e-06  | ATCCAGACAG | 5.9e-05  | GGTCAGACA  | 8.5e-05 |            |          |
| CD79a     | 3           | GGCCAGACTG | 4.3e-05  | GGCCAGACTG | 4.3e-05  | AGTCAGACTG | 8.5e-05 |            |          |
| Gvin1     | 3           | ATCCAGACAT | 1.9e-05  | TCGTAGACAG | 4.3e-05  | TGCCAGACTG | 5.9e-05 |            |          |
| Pard6a    | 3           | AGCCAGACAC | 1.3e-05  | ACGTAGACTC | 5.9e-05  | AGCTAGACAC | 8.5e-05 |            |          |
| Uaca      | 3           | AGCCAGACAG | 4.3e-05  | AGCCAGACAG | 4.3e-05  | AGCCAGACAC | 8.5e-05 |            |          |
| Upp1      | 3           | TGCCAGACTG | 5.9e-05  | GGCCAGACAC | 5.9e-05  | ATCCAGACAT | 8.5e-05 |            |          |
| Pla2g7    | 3           | AGTCAGACAC | 8.5e-05  | AGTCAGACAC | 8.5e-05  | AGTCAGACTG | 8.5e-05 |            |          |
| Dpys13    | 3           | GGCCAGACAC | 1.3e-05  | AGTCAGACAG | 8.5e-05  | AGTCAGACTG | 8.5e-05 |            |          |
| Slc14a1   | 3           | AGTCAGACAC | 4.3e-05  | ATCCAGACTC | 8.5e-05  | AGCCAGACAC | 8.5e-05 |            |          |
| fhl2      | 2           | ACGTAGACAT | 5.9e-05  | ACGTAGACAG | 5.9e-05  |            |         |            |          |
| Il1r1-201 | 2           | TCGCAGACAG | 1.3e-05  | AGCCAGACAC | 8.5e-05  |            |         |            |          |
| Stat4     | 2           | ATCCAGACTG | 5.9e-05  | ATGCAGACAC | 8.5e-05  |            |         |            |          |
| Ly75      | 2           | ATCCAGACAG | 5.9e-05  | ATGCAGACAG | 8.5e-05  |            |         |            |          |
| Akl       | 2           | GGCCAGACAT | 4.3e-05  | AGCCAGACAC | 8.5e-05  |            |         |            |          |
| M1lt11    | 2           | GGCCAGACTG | 4.3e-05  | GTCCAGACTG | 8.5e-05  |            |         |            |          |
| Glipr2    | 2           | GGCCAGACAT | 4.3e-05  | TGCCAGACAG | 5.9e-05  |            |         |            |          |
| Steap1    | 2           | GGCCAGACAC | 5.9e-05  | TGCCAGACTC | 8.5e-05  |            |         |            |          |
| Tbx3      | 2           | CGGTAGACTG | 1.9e-05  | GGCCAGACAC | 5.9e-05  |            |         |            |          |
| Spp1      | 2           | AGCCAGACTG | 4.3e-05  | GTCCAGACAG | 8.5e-05  |            |         |            |          |
| Pthlh     | 2           | AGCCAGACCG | 1.3e-05  | AGGTAGACCG | 1.9e-05  |            |         |            |          |
| Pde3b     | 2           | TGCCAGACAT | 5.9e-05  | GTCCAGACAG | 8.5e-05  |            |         |            |          |
| Pvr       | 2           | TGCCAGACAT | 5.9e-05  | GTCCAGACAT | 8.5e-05  |            |         |            |          |
| Arnt1     | 2           | AGCCAGACAG | 4.3e-05  | GTCCAGACAG | 8.5e-05  |            |         |            |          |
| Gng8      | 2           | ATCCAGACCG | 1.6e-06  | AGTCAGACAG | 8.5e-05  |            |         |            |          |
| Sema7a    | 2           | AGCCAGACCG | 4.3e-05  | GGCCAGACTC | 4.3e-05  |            |         |            |          |
| Maged1    | 2           | GGCCAGACAC | 5.9e-05  | AGCCAGACAC | 8.5e-05  |            |         |            |          |
| Nudt4     | 2           | CGCCAGACAC | 4.3e-05  | AGCCAGACAT | 4.3e-05  |            |         |            |          |
| Fkbp10    | 2           | TGCCAGACAG | 5.9e-05  | AGTCAGACAC | 8.5e-05  |            |         |            |          |
| Stac2     | 2           | GTCCAGACAG | 8.5e-05  | AGTCAGACAT | 8.5e-05  |            |         |            |          |
| Eml1      | 2           | AGCCAGACAC | 8.5e-05  | CGCCAGACCG | 1.9e-05  |            |         |            |          |
| Scara3    | 2           | TCGCAGACAG | 2.8e-06  | AGCCAGACAC | 8.5e-05  |            |         |            |          |
| Kdelr3    | 2           | CGCCAGACAC | 5.9e-05  | GGTCAGACAG | 8.5e-05  |            |         |            |          |
| Cdh6      | 2           | ATCCAGACAG | 5.9e-05  | ATGCAGACAC | 8.5e-05  |            |         |            |          |
| Has2      | 2           | ACGCAGACAG | 1.3e-05  | TGCCAGACAG | 1.9e-05  |            |         |            |          |
| Dab2      | 2           | AGCCAGACAC | 1.3e-05  | GTCCAGACAC | 4.3e-05  |            |         |            |          |
| Vegfa     | 2           | ACGCAGACTC | 1.9e-05  | ATCCAGACAG | 5.9e-05  |            |         |            |          |
| Msln      | 2           | AGCCAGACAC | 1.3e-05  | TGCCAGACAC | 1.9e-05  |            |         |            |          |
| Stamp11   | 2           | AGCCAGACAC | 1.3e-05  | AGGTAGACCG | 1.9e-05  |            |         |            |          |
| Gprc5b    | 1           | GGTCAGACCG | 2.8e-06  |            |          |            |         |            |          |
| Rgs2      | 1           | TGCCAGACAT | 5.9e-05  |            |          |            |         |            |          |
| Rgs16     | 1           | GTCCAGACCG | 8.5e-05  |            |          |            |         |            |          |
| Htr5b     | 1           | GGTCAGACCG | 8.5e-05  |            |          |            |         |            |          |
| Il1r1-202 | 1           | GTCCAGACAG | 8.5e-05  |            |          |            |         |            |          |
| hoxd8     | 1           | TGCCAGACAC | 1.9e-05  |            |          |            |         |            |          |
| Snail     | 1           | GGCCAGACTC | 4.3e-05  |            |          |            |         |            |          |
| Dnm1      | 1           | GTCCAGACAG | 8.5e-05  |            |          |            |         |            |          |
| Tfpi      | 1           | GGCCAGACAC | 1.3e-05  |            |          |            |         |            |          |
| Zfx4      | 1           | AGCCAGACAC | 8.5e-05  |            |          |            |         |            |          |
| Pdgfc     | 1           | AGTCAGACAG | 8.5e-05  |            |          |            |         |            |          |
| Cyr61     | 1           | GGCCAGACAC | 1.3e-05  |            |          |            |         |            |          |
| Hs2st1    | 1           | CGCCAGACCG | 1.9e-05  |            |          |            |         |            |          |
| Sec24d    | 1           | AGCCAGACAC | 1.3e-05  |            |          |            |         |            |          |
| Gpr149    | 1           | GGCCAGACTG | 4.3e-05  |            |          |            |         |            |          |
| Tram111   | 1           | ATCCAGACAG | 5.9e-05  |            |          |            |         |            |          |
| Cp        | 1           | AGTCAGACA  | 4.3e-05  |            |          |            |         |            |          |
| Prkacb    | 1           | AGTCAGACAG | 8.5e-05  |            |          |            |         |            |          |
| Epha7     | 1           | ATCCAGACAC | 1.9e-05  |            |          |            |         |            |          |
| Mxra8     | 1           | AGCCAGACAC | 8.5e-05  |            |          |            |         |            |          |
| Tusc1     | 1           | ATCCAGACAT | 8.5e-05  |            |          |            |         |            |          |
| Kpna6     | 1           | AGTCAGACA  | 4.3e-05  |            |          |            |         |            |          |
| Trit1     | 1           | AGCTAGACCG | 1.3e-05  |            |          |            |         |            |          |
| Steap2    | 1           | GGTCAGACTG | 8.5e-05  |            |          |            |         |            |          |
| IL6       | 1           | TGCCAGACAG | 5.9e-05  |            |          |            |         |            |          |
| Usp18     | 1           | CGGTAGACTC | 1.9e-05  |            |          |            |         |            |          |
| Camk1     | 1           | AGCTAGACAC | 8.5e-05  |            |          |            |         |            |          |
| Cald1     | 1           | AGCCAGACAC | 8.5e-05  |            |          |            |         |            |          |
| Axl       | 1           | AGCTAGACAC | 8.5e-05  |            |          |            |         |            |          |
| Nupr1     | 1           | GGCCAGACAT | 4.3e-05  |            |          |            |         |            |          |
| Tead2     | 1           | ATCCAGACAT | 8.5e-05  |            |          |            |         |            |          |
| Il11      | 1           | GGCCAGACAG | 4.3e-05  |            |          |            |         |            |          |
| Cdyl2     | 1           | AGCCAGACAT | 4.3e-05  |            |          |            |         |            |          |
| Rasgrf1   | 1           | GGCCAGACCG | 2.8e-06  |            |          |            |         |            |          |
| Itm2a     | 1           | GTCCAGACAG | 8.5e-05  |            |          |            |         |            |          |
| Sh3kbp1   | 1           | GTCCAGACAG | 8.5e-05  |            |          |            |         |            |          |
| Flna      | 1           | AGTCAGACTG | 8.5e-05  |            |          |            |         |            |          |
| Cnn2      | 1           | CGCCAGACAG | 8.5e-05  |            |          |            |         |            |          |
| Aldh112   | 1           | TGCCAGACAG | 5.9e-05  |            |          |            |         |            |          |
| CCL2      | 1           | AGCCAGACAT | 4.3e-05  |            |          |            |         |            |          |
| Mmd       | 1           | CGGTAGACTC | 1.9e-05  |            |          |            |         |            |          |
| Ccl17     | 1           | AGCCAGACAC | 1.3e-05  |            |          |            |         |            |          |
| Ccl15     | 1           | TGCCAGACAG | 5.9e-05  |            |          |            |         |            |          |
| hoxb7     | 1           | ACGCAGACTG | 1.3e-05  |            |          |            |         |            |          |
| Slc16a3   | 1           | GTCCAGACTG | 8.5e-05  |            |          |            |         |            |          |
| Ntn1      | 1           | GTCCAGACTG | 8.5e-05  |            |          |            |         |            |          |
| Lamb1-1   | 1           | AGCCAGACAG | 4.3e-05  |            |          |            |         |            |          |
| Lox12     | 1           | ATGCAGACAC | 8.5e-05  |            |          |            |         |            |          |
| Bmp1      | 1           | GGTCAGACTG | 8.5e-05  |            |          |            |         |            |          |
| Ghr       | 1           | CGGTAGACAG | 1.3e-05  |            |          |            |         |            |          |
| Rail4     | 1           | AGCCAGACAC | 8.5e-05  |            |          |            |         |            |          |
| Ghr       | 1           | CGGTAGACAG | 1.3e-05  |            |          |            |         |            |          |
| Adamts1   | 1           | AGCCAGACAG | 4.3e-05  |            |          |            |         |            |          |
| Cdh2      | 1           | TGCCAGACAC | 1.9e-05  |            |          |            |         |            |          |
| Dpys13    | 1           | GGTCAGACTG | 8.5e-05  |            |          |            |         |            |          |
| Pcsk5     | 1           | GGCCAGACAC | 1.3e-05  |            |          |            |         |            |          |
| Ins16     | 1           | GGCCAGACAG | 4.3e-05  |            |          |            |         |            |          |
| Pik3ap1   | 1           | ATGCAGACAC | 8.5e-05  |            |          |            |         |            |          |

Table S3
